# Supplementary material for: Increasing Atmospheric Aridity Moderates the Accelerated Rate of Vegetation Green-Up Induced by Rising CO2 and Warming
Source: MDPI journal article supplement (doi:10.3390/rs14163946), 2022-08-14
Supplement: s1 [file s1]

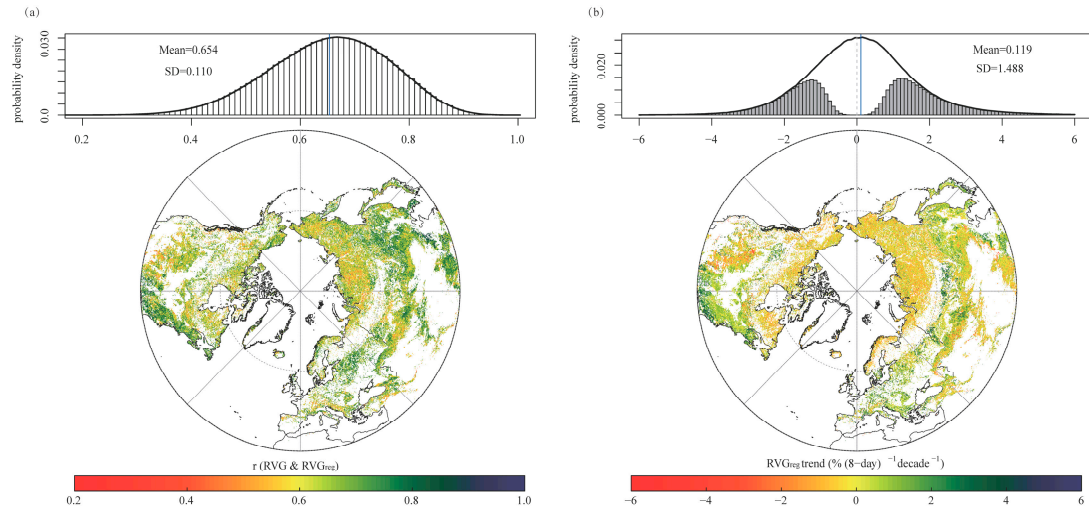

**Figure S1** (a) Correlation coefficient ( $r$ ) between RVG and regressed RVG ( $RVG_{reg}$ ) for multilinear regression considering interactions between variables, and (b) The  $RVG_{reg}$  trend based on the multivariable regression considering interactions between variables.

As shown in Figure S1 the high correlation ( $r: 0.654 \pm 0.110$ ) between RVG and  $RVG_{reg}$  indicated the reliability of MRCI method for the study of the RVG changes. Thus the MRCI approach was suited to analyze the long-term RVG trends.

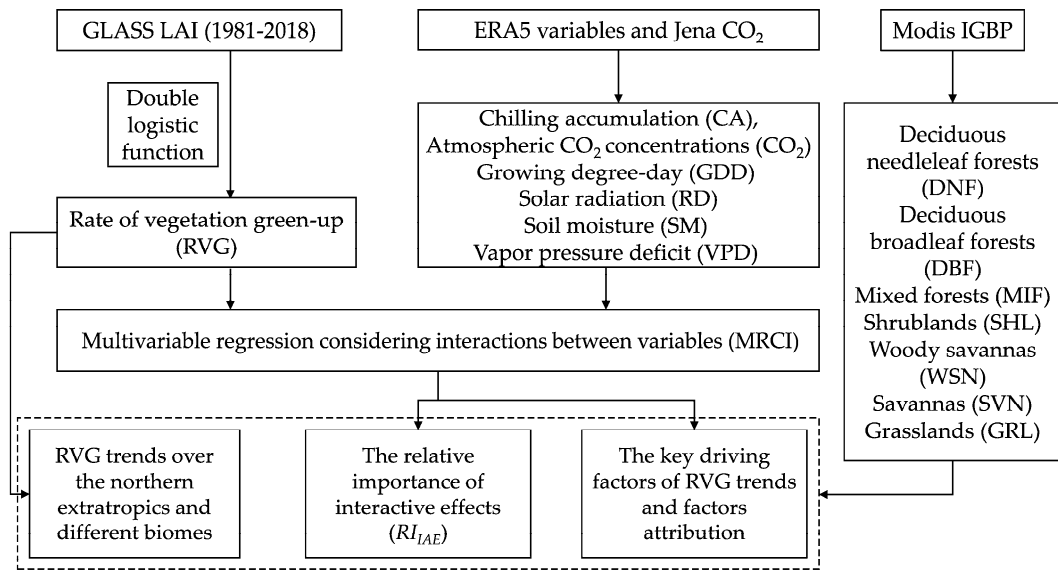

**Figure S2** The workflow of this study

Table S1 Environmental variables and interactions between variables used in MRCI models, variance inflation factor (VIF), the coefficient of determination ( $R^2$ ) and p-value for different biomes.

|                      | Biomes              | DNF    | DBF    | MIF   | SHL    | WSN    | SVN    | GRL    |
|----------------------|---------------------|--------|--------|-------|--------|--------|--------|--------|
| Individual variables | CA                  | 1.689  | 2.378  | 2.605 | 2.591  | 1.742  | 1.461  | 2.605  |
|                      | GDD                 | 11.670 | 8.358  | 9.382 | 8.367  | 10.479 | 9.511  | 9.382  |
|                      | VPD                 | 8.410  | 10.853 | 8.604 | 6.158  | 9.846  | 10.615 | 8.604  |
|                      | RD                  | 3.160  | 3.097  | 3.503 | 4.574  | 3.642  | 2.998  | 3.503  |
|                      | SM                  | 2.195  | 3.350  | 1.463 | 1.683  | 1.724  | 6.134  | 1.463  |
|                      | CO <sub>2</sub>     | 4.861  | 4.590  | 7.259 | 10.185 | 6.144  | 8.800  | 7.259  |
|                      | GDD:CA              | -      | 7.628  | -     | -      | 9.997  | -      | -      |
|                      | GDD:RD              | -      | -      | 4.084 | -      | -      | -      | 4.084  |
|                      | GDD:SM              | -      | -      | -     | -      | -      | -      | -      |
|                      | GDD:VPD             | 1.415  | 1.595  | 2.091 | -      | 1.787  | 1.342  | 2.091  |
|                      | GDD:CO <sub>2</sub> | -      | -      | -     | -      | -      | -      | -      |
| Interaction terms    | CA:RD               | 1.911  | 3.415  | 2.493 | 3.534  | 3.503  | 1.361  | 2.493  |
|                      | CA:SM               | 1.753  | 2.639  | 1.647 | 1.391  | 3.233  | 1.355  | 1.647  |
|                      | CA:VPD              | -      | 6.100  | -     | -      | 8.945  | -      | -      |
|                      | CA:CO <sub>2</sub>  | 2.604  | 5.404  | 3.009 | 4.727  | 10.930 | -      | 3.009  |
|                      | RD:SM               | 2.838  | 4.587  | 2.572 | -      | 1.881  | 4.263  | 2.572  |
|                      | RD:VPD              | -      | -      | -     | -      | -      | -      | -      |
|                      | RD:CO <sub>2</sub>  | 3.177  | 2.244  | 1.963 | 1.537  | 2.350  | 2.325  | 1.963  |
|                      | SM:VPD              | -      | -      | -     | -      | -      | -      | -      |
|                      | SM:CO <sub>2</sub>  | -      | 6.442  | -     | -      | -      | 6.010  | -      |
|                      | VPD:CO <sub>2</sub> | -      | -      | -     | -      | -      | -      | -      |
| <b>R<sup>2</sup></b> |                     | 0.463  | 0.724  | 0.654 | 0.918  | 0.775  | 0.807  | 0.686  |
| <b>p-value</b>       |                     | 0.099  | <0.001 | 0.004 | <0.001 | <0.001 | <0.001 | <0.001 |

A:B represents the interaction between A and B
