# Supplementary figures and images for: Increasing Atmospheric Aridity Moderates the Accelerated Rate of Vegetation Green-Up Induced by Rising CO2 and Warming
Source: MDPI journal article supplement (doi:10.3390/rs14163946), 2022-08-14

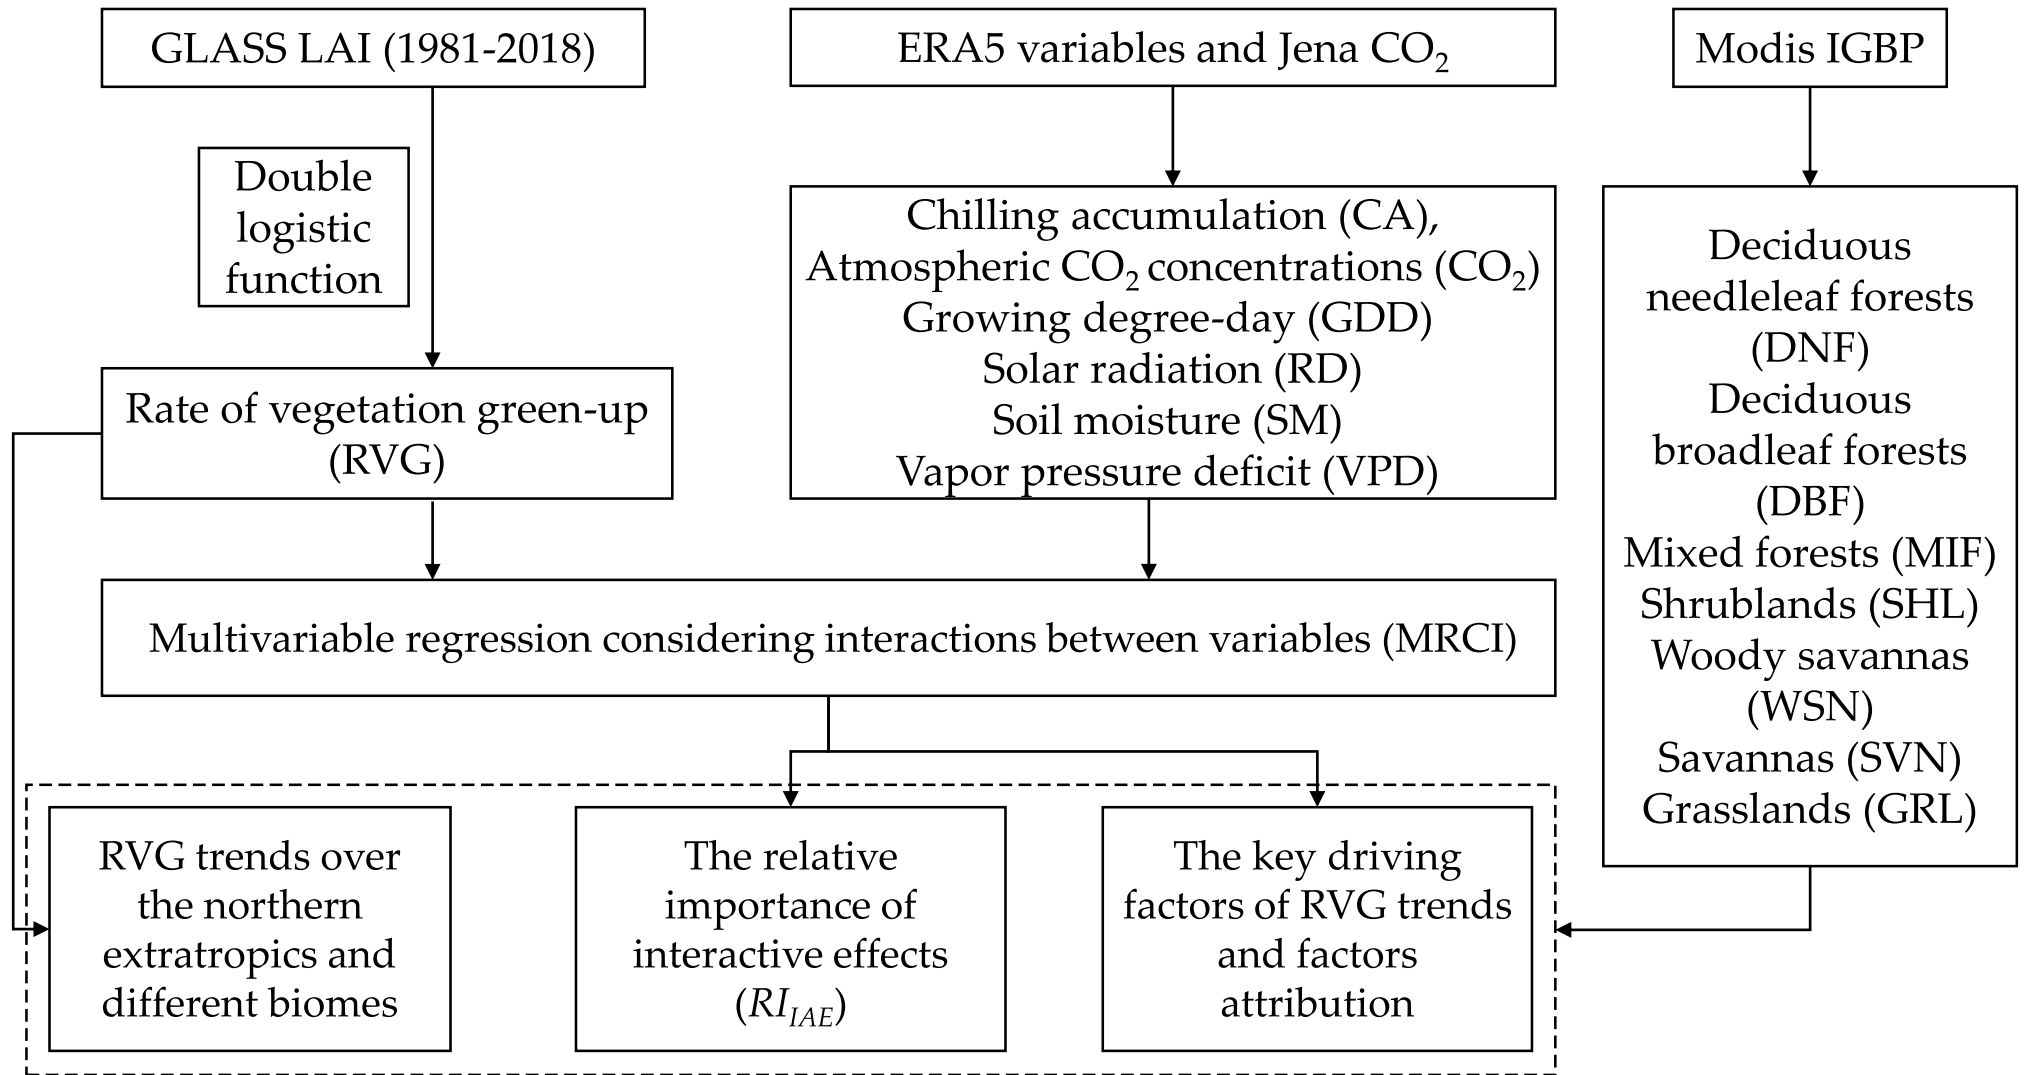

Supplement: s1 [file s1]

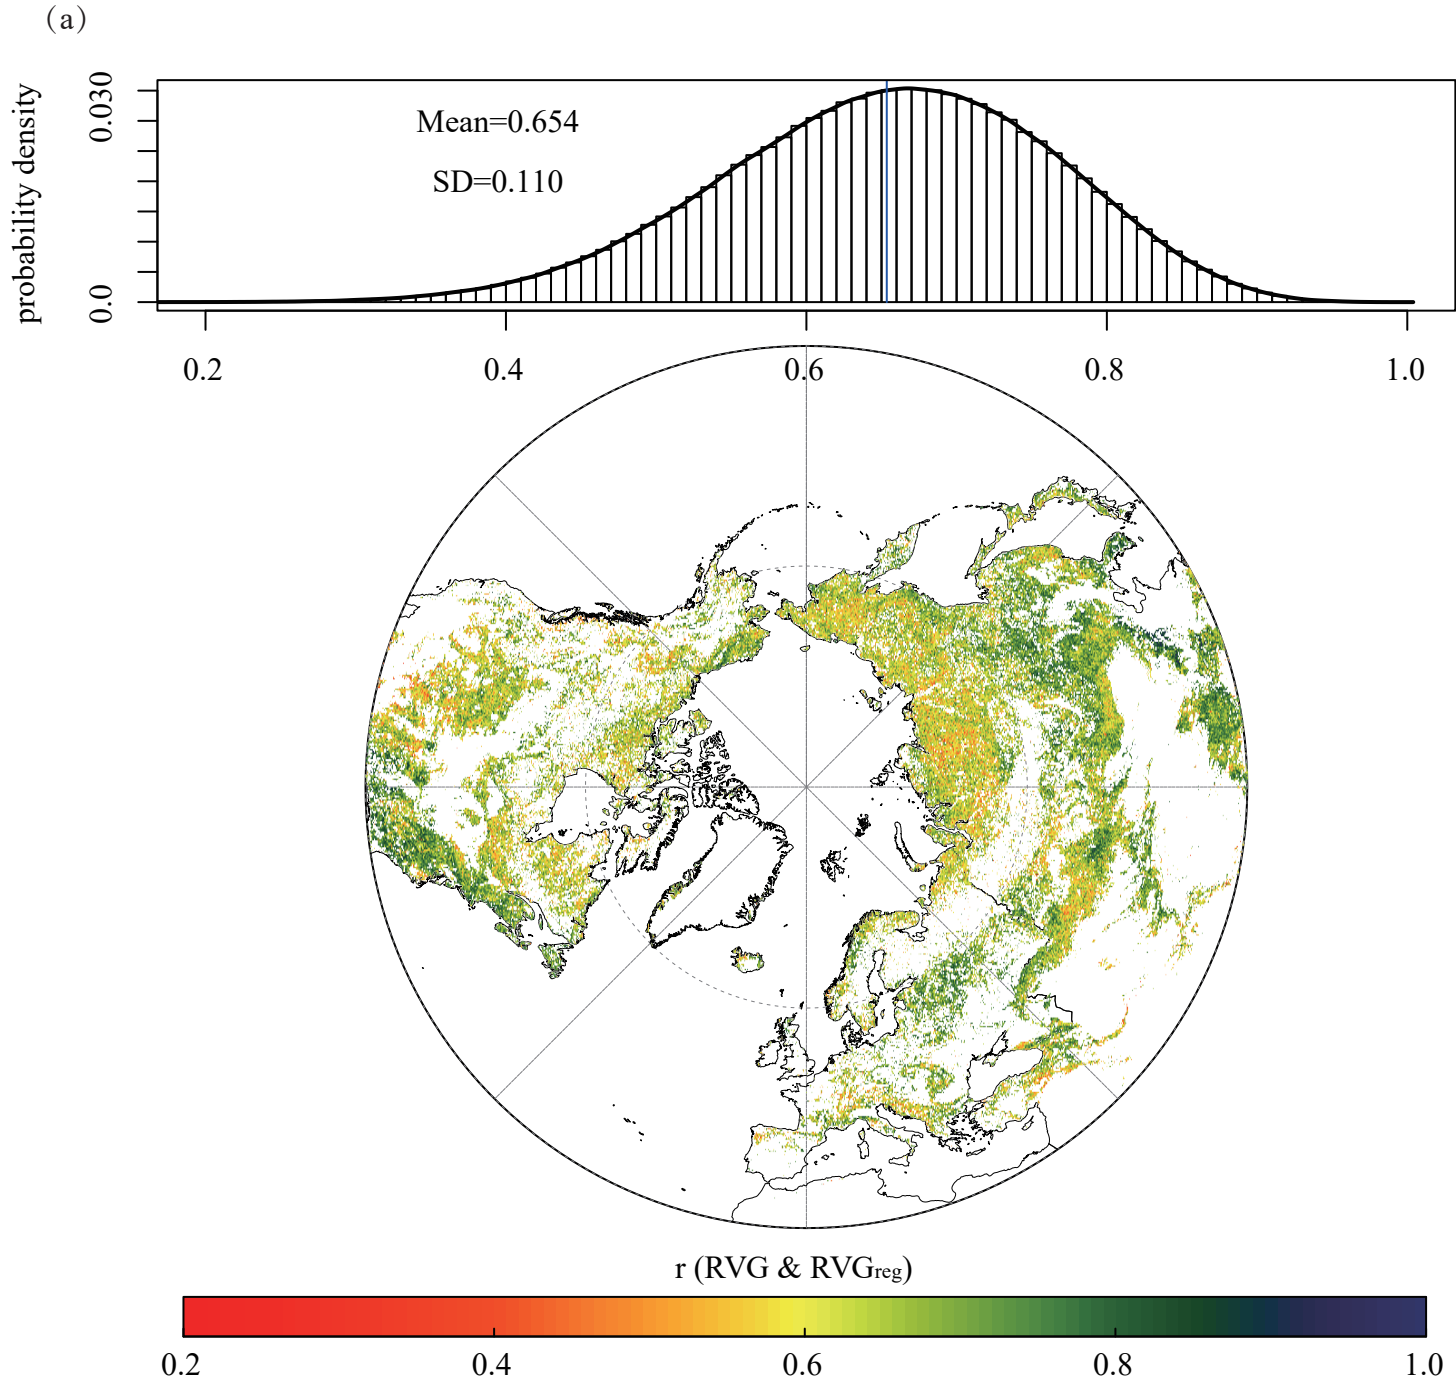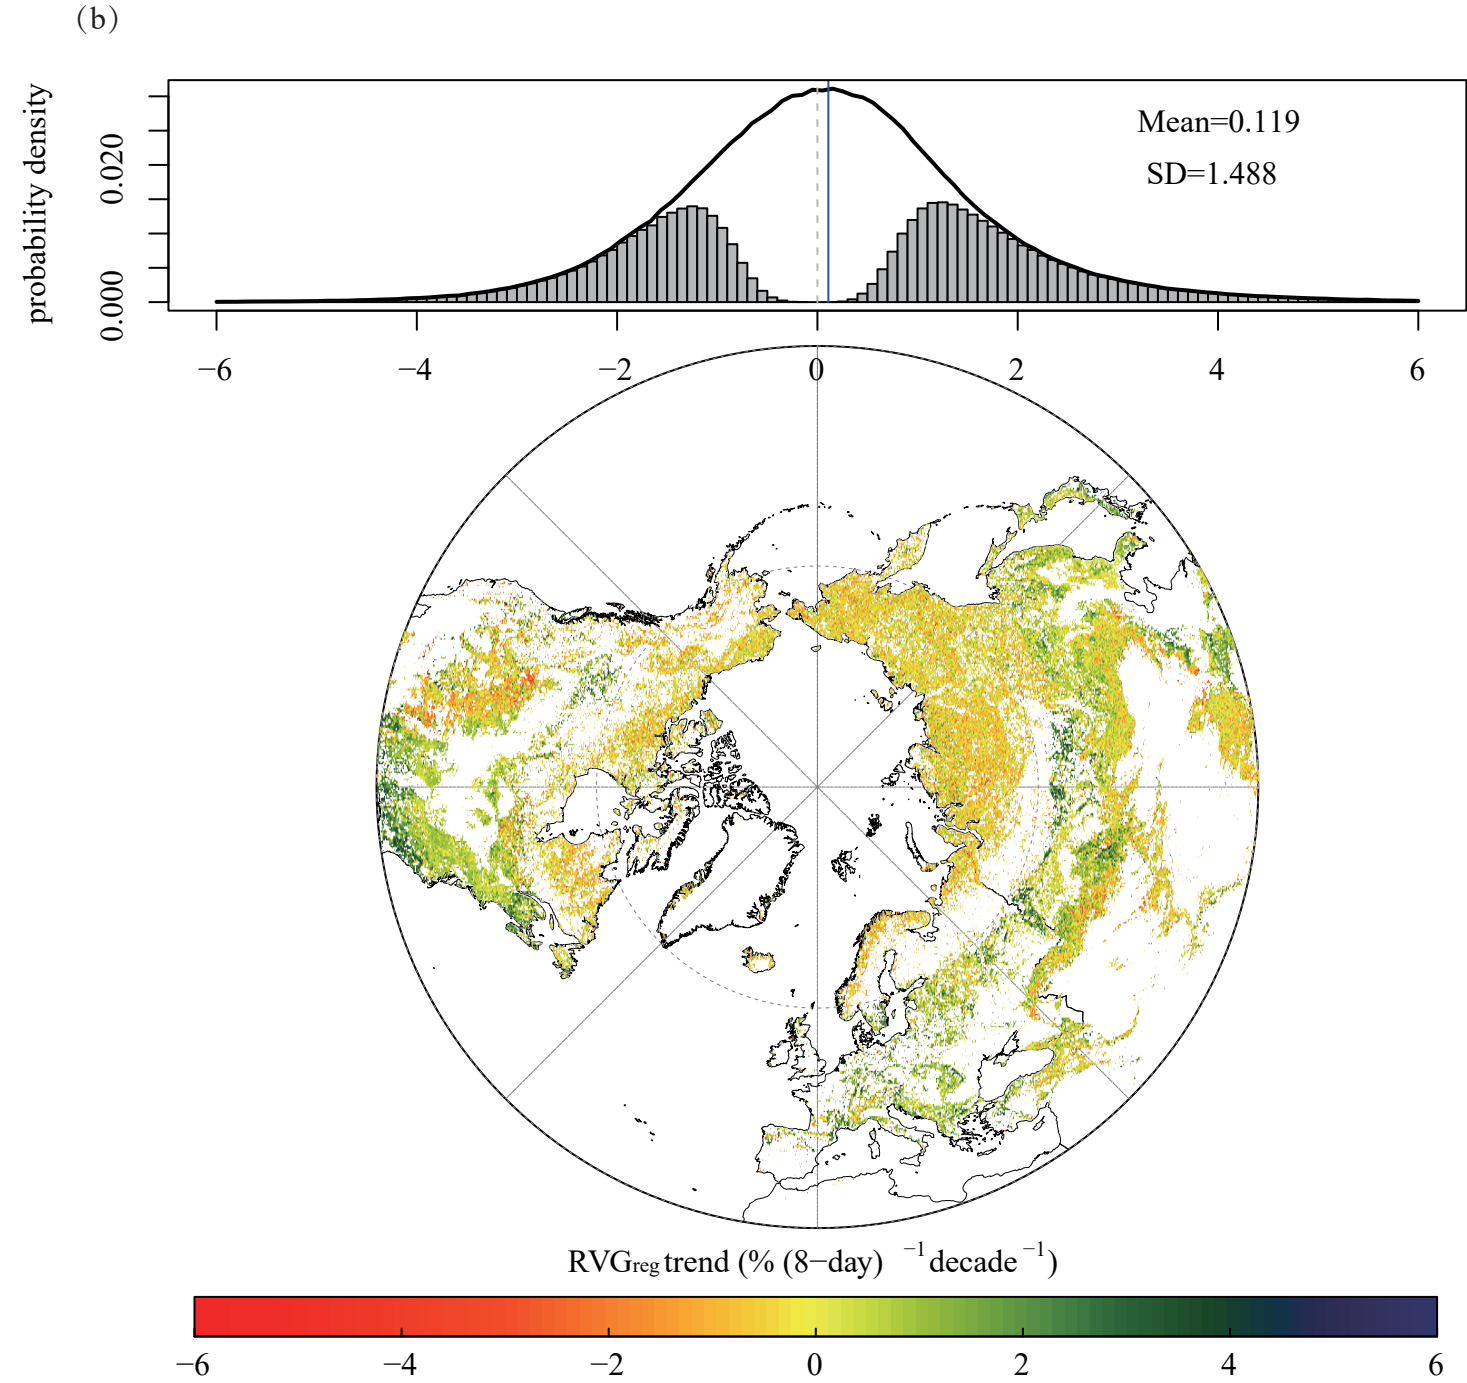

Supplement: s1 [file s1]
